# Mendelian randomization analysis identifies a causal effect of *Streptococcus salivarius* on DR mediating via the level of host fasting glucose

Jingjing Li<sup>1,2,6</sup>, Gongwei Zheng<sup>1,2,6</sup>, Dingping Jiang<sup>1,2</sup>, Chunyu Deng<sup>1,2,5</sup>, Yaru Zhang<sup>1,2</sup>, Yunlong Ma<sup>1,2#</sup>, Jianzhong Su<sup>1,2,3,4#</sup>

<sup>1</sup> National Engineering Research Center of Ophthalmology and Optometry, Eye Hospital, Wenzhou Medical University, Wenzhou, 325027, China

<sup>2</sup> Department of Biomedical Informatics, Institute of Biomedical Big Data, Wenzhou Medical University, Wenzhou, 325027, China

<sup>3</sup> Oujiang Laboratory, Zhejiang Lab for Regenerative Medicine, Vision and Brain Health, Wenzhou 325101, Zhejiang, China

<sup>4</sup> Wenzhou Institute, University of Chinese Academy of Sciences, Wenzhou 325011, China

<sup>5</sup> School of Life Science and Technology, Harbin Institute of Technology, Harbin, Heilongjiang 150080, China

<sup>6</sup> These authors contributed equally to this work.

#To whom correspondence should be addressed: Jianzhong Su, e-mail: [sujz@wmu.edu.cn](mailto:sujz@wmu.edu.cn); Yunlong Ma, e-mail: [myl\\_genomics@wmu.edu.cn](mailto:myl_genomics@wmu.edu.cn).

## Abstract

**Background:** Diabetic retinopathy (DR) is one of leading causes of vision loss in adults with increasing prevalence worldwide. Increasing evidence has emphasized the importance of gut microbiome in the etiology and development of DR. However, the causal relationship between gut microbes and DR remains largely unknown.

**Methods:** To investigate the causal associations of DR with gut microbes and DR risk factors, we employed two-sample Mendelian Randomization (MR) analyses to estimate the causal effects of 207 gut microbes on DR outcomes. Inputs for MR included Genome-wide Association Study (GWAS) summary statistics of 207 taxa of gut microbes (the Dutch Microbiome Project) and 21 risk factors for DR. The GWAS summary statistics data of DR was from the FinnGen Research Project. Data analysis was performed in May 2023.

**Results:** We identified eight bacterial taxa that exhibited significant causal associations with DR (FDR < 0.05). Among them, genus *Collinsella* and species *Collinsella aerofaciens* were associated with increased risk of DR, while the species *Bacteroides faecis*, *Burkholderiales bacterium\_1\_1\_47*, *Ruminococcus torques*, *Streptococcus salivarius*, genus *Burkholderiales\_noname*, and family *Burkholderiales\_noname* showed protective effects against DR. Notably, we found that the causal effect of species *Streptococcus salivarius* on DR was mediated through the level of host fasting glucose, a well-established risk factor for DR.

NOTE: This preprint reports new research that has not been certified by peer review and should not be used to guide clinical practice.

41 **Conclusions:** Our results reveal that specific gut microbes may be causally linked to DR via mediating  
42 host metabolic risk factors, highlighting potential novel therapeutic or preventive targets for DR.

43

44 **Keywords:** Diabetic retinopathy; Gut microbes; Mendelian randomization; Metabolic risk factors

45

## 46 **Introduction**

47 Diabetic retinopathy (DR) is a vision-threatening complication in patients with diabetes (both type 1  
48 and type 2) and has been one of the leading causes of vision loss in adults aged 20–74 years [1]. Among  
49 individuals with diabetes, the overall prevalence of DR is estimated to be 34.6% [1]. According to the  
50 Global Burden of Disease Study [2], while the prevalence of blindness for other causes consistently  
51 showed a regional decrease between 1990 and 2020, the prevalence of DR increased in many regions,  
52 especially Asia, sub-Saharan Africa, and high-income North America. Given that people with diabetes  
53 live increasingly longer, the number of people with diabetic retinopathy and resulting vision  
54 impairment is expected to rapidly rise, reaching 160.50 million by 2045 from 103.12 million in 2012  
55 [3].

56 The well-established major risk factors for DR contain hyperglycemia, hypertension, and dyslipidemia.  
57 A pooled analysis using 22,896 participants from 35 studies in the U.S., Australia, Europe, and Asia  
58 has summarized that the prevalence of DR increased with diabetes duration, HbA1c, and blood  
59 pressure [1]. The Singapore Malay Eye Study showed that independent risk factors for DR were longer  
60 diabetes duration, higher hemoglobin A1c, hypertension, and higher pulse pressure [4]. In the Chinese  
61 type 2 diabetic patients' study, hyperlipidemia, higher VLDL, and higher triglyceride were  
62 independently associated with the increased risk of DR [5]. In addition, inflammatory markers and  
63 cytokines, such as CRP, IL6, IL8, IL16, and TNF- $\alpha$ , were also implicated to be associated with the  
64 development of DR [6-9].

65 Extensive studies have highlighted the importance of oxidative stress induced by hyperglycemia on  
66 the development of DR [10]. Abnormal cellular signaling between the neuronal and vascular retina,  
67 increased retinal vascular permeability, neovascularization and altered neuronal functions were  
68 involved in the etiology of DR. A variety of molecules and neurovascular signaling pathways have  
69 been reported to be associated with DR risk, such as vascular endothelial growth factor A (VEGFA),  
70 kinin-kallikrein system, angiopoietin-like 4 (ANGPTL4) and Leucine-rich  $\alpha$ 2-glycoprotein 1 (LRG1)  
71 [11].

72 Recently, gut microbiome dysbiosis is proposed to be associated with eye diseases, including uveitis,  
73 glaucoma, age-related macular degeneration, and DR, deriving the concept of gut-eye axis [12].  
74 Multiple lines of evidence have shown that there exist a remarkable involvement of aberrant gut  
75 microbiota in ocular diseases based on on human and mouse models [12]. For instance, translocation  
76 of peptidoglycan derived from cell wall of gut microbes to retina was identified to activate TLR2-

77 mediated MyD88/ARNO/ARF6 signaling pathway and promote DR [13]. Moreover, reconstruction of  
78 gut microbiome by antibiotic therapies or intermittent fasting have been distinguished to prevent the  
79 development of DR [14]. Despite evidence that gut microbiome affects DR, there is paucity of  
80 knowledge regarding which specific species or clades of gut microbes are causal for DR, and how  
81 these causal gut microbes influence DR.

82 Genome-wide association study (GWAS) of microbe abundances have identified genetic variants that  
83 are associated with microbes [15], providing a promising opportunity to examine the causal effects of  
84 microbes on DR using Mendelian Randomisation (MR) [16]. In this study, we investigated the causal  
85 associations of DR with gut microbes and DR risk factors using two-sample Mendelian Randomization  
86 framework. We collected and curated largest and most comprehensive GWAS summary statistics of  
87 207 taxa of gut microbes and 21 risk factors for DR. Causal mechanisms were explored using  
88 mediation analyses, revealing the role of blood biochemical indicators (e.g., blood glucose) in  
89 mediating the effects of gut microbes on DR. In summary, our systematic MR analysis provides  
90 valuable novel insights into the complex interplay among the gut microbiome, metabolic risk factors,  
91 and DR.

92

## 93 **Methods**

### 94 **Data source**

95 Microbe GWAS summary data based on the largest genome-wide association study (GWAS) of 207  
96 gut microbial taxa (Supplementary Table S1) were downloaded from the Dutch Microbiome Project  
97 [15]. The Dutch Microbiome Project has launched and reported the large-scale GWAS of gut  
98 microbiome composition in 7,738 volunteers from Netherlands by applying metagenomic sequencing,  
99 which allows for bacterial identification at species-level resolution.

100 For DR, we utilized summary statistics from the FinnGen Research Project, which is the leading  
101 biobank-based genomic research project with more than 1,900 diseases aiming to include 500,000  
102 Finland participants (n = 218,792 participants in data release 5) [17]. Broad diabetic retinopathy  
103 phenotypes were extracted from phenotype documentation of FinnGen database release 5  
104 (<https://www.finnngen.fi/en/researchers/clinical-endpoints>). After stringent quality control and  
105 phenotype screening, we included 3 DR-relevant phenotypes, whose phenotype codes were  
106 H7\_RETINOPATHYDIAB (denoted as DR1), DM\_RETINOPATHY\_EXMORE (denoted as DR2)  
107 and DM\_RETINOPATHY (denoted as DR3). DR1 was from the category of “VII Diseases of the eye  
108 and adnexa”, while DR2 and DR3 were from the category of “diabetes endpoints”. Overall, 3,646  
109 cases and 203,018 controls were included in DR1, 14,584 cases and 176,010 controls were included  
110 in DR2, 14,584 and 202,082 controls were included in DR3 (Supplementary Table S2).

111

## 112 **Metabolic Risk factors for DR**

113 The development of DR is related to many metabolic risk factors and dysfunctions [18].  
114 Hyperglycemia, hypertension, and dyslipidemia were reported to be major risk factors for DR [1, 4].  
115 Thus, we included GWAS of plasma metabolic variables representing the three major risk factors from  
116 the FinnGen project, which were fasting insulin (FI), fasting glucose (FG), HbA1c, 2h glucose after  
117 an oral glucose challenge (2hGlu), triglyceride (TG), very low-density lipoprotein (VLDL), high-  
118 density lipoprotein (HDL), low-density lipoprotein (LDL), hypercholesterolaemia, high cholesterol,  
119 systolic blood pressure (SBP), and diastolic blood pressure (DBP). In addition, body mass index (BMI)  
120 [19] and other previous reported DR risk factors, including C-reactive protein (CRP) [6], IL6 [7],  
121 CCL5 [20], IL8, IL16 [8], and nerve growth factor (NGF) [21], were also included in this study. For  
122 these included putative DR-relevant risk factors, GWAS summary statistics were restricted to  
123 European populations.

124

## 125 **Mendelian Randomization strategy**

126 The principle of MR is using genetic variation as instrumental variable to estimate the causal  
127 relationship between exposure and outcome [22]. The MR approach relies on three key assumptions:  
128 (i) the genetic variants used as instrumental variables (IVs) are associated with the preset exposure  
129 variable. (ii) there are no unmeasured confounders affecting the associations between genetic variants  
130 and outcomes; and (iii) the genetic variants affect the outcome only through changes in the exposure,  
131 without exhibiting pleiotropy.

132 In this study, two-sample MR method [22, 23] was applied to evaluate causal relationship between  
133 predefined exposure and outcome variables. SNPs reaching significance threshold ( $p < 1e-05$ ) were  
134 extracted from GWAS summary statistics of exposure and used as instrumental variables (IVs). To  
135 ensure statistical independence across SNPs, we conducted LD clumping with a cut-off of  $r^2 < 0.1$   
136 within a 1Mb window. Statistics of these IVs were subsequently extracted from GWAS summary  
137 statistics on outcome. After harmonising the direction of estimates of SNP-exposure and SNP-outcome  
138 associations, MR estimates were generated to assess the effect of genetic liability of exposure to  
139 outcome. To obtain the MR causal effect estimates, Wald's ratio method was applied when there is  
140 only one (IVs) available for exposure. The inverse variance weighting (IVW) method in fixed-effect  
141 framework was applied if the number of IVs is between 1 and 3. For the case that the number of IVs  
142 surpass 3, we utilized the inverse variance weighting (IVW) method in multiplicative random-effects  
143 framework [24]. The IVW method combining with multiplicative random-effects model was able to  
144 handle the dispersion of effect estimates due to pleiotropy. To avoid violating the MR assumption, we  
145 performed three sensitivity analyses to assess the robustness of the results. Specifically, heterogeneity  
146 was estimated by the Cochran Q test [25]. Horizontal pleiotropy was estimated using MR-Egger's  
147 intercept [26], and influential outlier IVs due to pleiotropy were assessed using MR Pleiotropy

148 Residual Sum and Outlier (MR-PRESSO) [27].

149

## 150 **Systematic MR screening for putative causal gut microbes and risk factors of DR**

151 At the first stage, we applied the two-sample MR strategy to evaluate causal relationship between gut  
152 microbes and DR by defining gut microbes as exposures and DR as outcome (Gut microbes → DR).  
153 We employed the two-sample MR strategy for all gut microbial taxon - DR pairs. All statistical tests  
154 were two-sided and adjusted for multiple hypothesis testing (Benjamini-Hochberg method). For each  
155 bacterial GWAS summary dataset, we calculated the MR causal effect estimates by combining it with  
156 each of the three DR GWAS summary statistics. We considered the bacteria to be causal for DR if (i)  
157 at least one of the three causal associations reach significant threshold ( $FDR < 0.05$ ); and (ii) direction  
158 of all three MR estimates are identical. Bacteria taxon that passed the screening criteria were included  
159 in the following MR analyses. Next, we applied the two-sample MR analyse on putative DR-relevant  
160 risk factors by defining them as exposures and DR as outcome (DR risk factors → DR). Finally, the  
161 MR strategy was implemented to infer causal relationships between putative causal gut microbes  
162 identified in the first stage and DR risk factors derived form the second step (Gut microbes → DR risk  
163 factors). The MR strategy and screening criteria for each step were consistent with the first stage. The  
164 MR analyses, Cochran Q, and MR-Egger sensitivity analyses were conducted using R package  
165 TwoSampleMR (Version: 0.5.6). MR-PRESSO test was performed using R package MRPRESSO  
166 (Version: 1.0). GWAS data was processed by R packages ieugwasr (Version 0.1.5), reshape2 (Version  
167 1.4.4), and dplyr (Version 1.0.7). Plots were visualized using R packages ggplot2 (Version 3.4.0),  
168 circlize (Version 0.4.15), and ComplexHeatmap (Version 2.13.1). All statistical analyses were  
169 performed in R 4.1.4 ([www.R-project.org](http://www.R-project.org)).

170

## 171 **Mediation analysis**

172 For “gut microbe – DR risk factor – DR” triplets that passed the MR screening, we performed  
173 mediation analyses to quantify the causal effects of gut microbes on DR via the risk factors. The total  
174 effect of gut microbes on DR was assessed by the primary MR (Gut microbes → DR). The indirect  
175 effect was estimated by two-step MR. In first Step, univariable MR model was employed to estimate  
176 the effects of the gut microbes on the DR risk factors (Gut microbes → DR risk factors). It involved  
177 assessing the causal relationship between the gut microbes and individual risk factors for DR. In second  
178 step, multivariable Mendelian randomization (MVMR) was carried out to estimate the effect of DR  
179 risk factor on DR (DR risk factors → DR), adjusting for the effect of corresponding gut microbe. It  
180 allowed us to evaluate the specific impact of the risk factors on DR, taking into account the potential  
181 confounding influence of the gut microbe. We used the product of these two estimates to calculate the  
182 indirect effect, as analogue to a previous study [28]. Standard errors and confidence interval (CI) of  
183 the indirect effect were estimated by using the Delta method [16, 29]. The proportion mediated effect

184 was yielded from dividing the indirect effect by the total effect.

185

## 186 **Results**

### 187 **Causal gut microbes for DR**

188 Figure 1 shows the workflow of the current study. A total of 207 gut microbes were tested for  
189 pinpointing causal relationships with DR (Supplementary Table S1 and S3). According to our  
190 screening criterion (see Methods), we identified 8 bacterial taxa that were causally associated with DR  
191 (Fig. 2, Supplementary Fig. S1 and Supplementary Table S4), namely, *g\_Collinsella*,  
192 *s\_Collinsella\_aerofaciens*, *s\_Bacteroides\_faecis*, *s\_Burkholderiales\_bacterium\_1\_1\_47*,  
193 *f\_Burkholderiales\_noname*, *g\_Burkholderiales\_noname*, *s\_Ruminococcus\_torques*, and  
194 *s\_Streptococcus\_salivarius*. Among these taxa, *g\_Collinsella* (OR per 1-SD higher bacterial  
195 abundance [95% CI] = 1.25 [0.03, 0.42] for DR2; 1.20 [0.09, 0.28] for DR3) and  
196 *s\_Collinsella\_aerofaciens* (OR [95% CI] = 1.24 [0.11, 0.33] for DR2; 1.09 [0.002, 0.16] for DR3)  
197 were associated with a higher risk of DR, while other taxa were associated with a lower risk of DR.  
198 This is consistent with previous opinion that *Collinsella* exerted adverse effects on human health [38]  
199 and contributed to the development of insulin resistance and diabetes [39].

200 Results of sensitivity analyses confirmed the robustness of the MR analyses for these taxa  
201 (Supplementary Table S4). As tested by Cochran Q statistics, there was no evidence for heterogeneity  
202 ( $P_{Q-stat} > 0.05$ ) or horizontal pleiotropy (MR-Egger test,  $P_{Egger-Intercept} > 0.05$ ; MR-PRESSO global  
203 pleiotropy test,  $P_{GlobalTest} > 0.05$ , Supplementary Table S4).

### 204 **Causal risk factors for DR**

205 To uncover potential DR risk factors that mediate the causal effects of gut microbes on DR, we first  
206 applied the two-sample MR strategy to screen risk factors that were causally associated with DR. For  
207 each of these risk factors included in this study, IVs were extracted from corresponding GWAS  
208 summary statistics restricted to European populations (Supplementary Table S5). There were 12 risk  
209 factors identified to be significantly causally associated with DR-relevant phenotypes. Among them,  
210 FI, Hypertension, FG, BMI, HbA1c, 2hGlu, TG, SBP, and DBP exhibited prominent associations with  
211 increased risk of DR, while IL16, LDL, and HDL were significantly associated with lower risk of DR  
212 (Fig. 3, Supplementary Fig. S2, and Supplementary Table S6). FI showed the strongest effect on DR  
213 (OR [95% CI] = 2.51 [1.54, 4.10] and 1.78 [1.38, 2.30] for DR1 and DR2, respectively), followed by  
214 hypertension (OR [95% CI] = 2.14 [1.73, 2.65] and 2.13 [1.38, 3.31] for DR1 and DR2, respectively).

215

216 Due to there exist significant heterogeneity (MR-PRESSO Global Test  $p < 0.05$  or an MR-Egger  
217 Intercept  $p < 0.05$ ) ( Supplementary Table S7), we leveraged the inverse variance weighting (IVW)  
218 method in multiplicative random-effects framework, which is preferred when there exist heterogeneity  
219 [30].

220

## 221 Risk factors associated with gut microbes

222 To prioritize critical risk factors exhibiting causal associations with both DR and gut microbes, we  
223 subsequently performed two-sample MR of these 12 significant DR-relevant risk factors with 8 DR-  
224 related bacterial taxa. A total of eight significant pairs of gut microbe and risk factor were identified  
225 (FDR < 0.05), and five pairs showed suggestive associations (P < 0.05, Fig. 4 and Supplementary Table  
226 S8). Among these significant pairs, we found that Taxon *s\_Streptococcus\_salivarius* was associated  
227 with lower risk of 2hGlu (OR [95% CI] = 0.88 [0.82, 0.95]) and FG (OR [95% CI] = 0.96 [0.95, 0.98]).  
228 Taxa *f\_Burkholderiales\_noname*, *g\_Burkholderiales\_noname*, and  
229 *s\_Burkholderiales\_bacterium\_1\_1\_47* were associated with lower risk of HbA1c (OR [95% CI] = 0.98  
230 [0.979, 0.996]) and higher risk of IL16 (OR [95% CI] = 1.05 [1.01, 1.09]). The other five suggestive  
231 associations included lower SBP risk of *g\_Collinsella* (OR [95% CI] = 0.742 [0.597, 0.924]) and  
232 *s\_Collinsella\_aerofaciens* (OR [95% CI] = 0.743 [0.594, 0.930]), lower DBP risk of  
233 *s\_Collinsella\_aerofaciens* (OR [95% CI] = 0.654 [0.457, 0.935]), higher IL16 risk of  
234 *s\_Collinsella\_aerofaciens* (OR [95% CI] = 1.107 [1.025, 1.196]) and lower LDL risk of  
235 *s\_Ruminococcus\_torques* (OR [95% CI] = 0.981 [0.966, 0.997]).  
236

## 237 Mediation effect of gut microbes on DR via risk factors

238 Based on abovementioned two-sample MR strategy, eight “gut microbe-risk factor-DR” triplets were  
239 identified to show pairwise causal associations. Thus, we used these eight triplets to estimate the  
240 statistical significance of mediation effects and the proportion of the overall effects of gut microbes on  
241 DR that was mediated by corresponding risk factors (Supplementary Table S9). Through Delta method  
242 [16, 29], we obtained four triplets having mediation effects that passed the threshold of raw p-value <  
243 0.05 (Fig. 5a). After multiple testing correction, one triplet, “*s\_Streptococcus-salivarius* -> FG ->  
244 DR1”, reached significant threshold (FDR < 0.05, Fig. 5b). The proportion of mediation effect of  
245 *s\_Streptococcus-salivarius* on DR via FG was 5.05%. For other three triplets with suggestive  
246 mediation effects (p-value < 0.05), we found that the causal effects of *s\_Burkholderiales-bacterium-*  
247 *1-1-47/g\_Burkholderiales-noname/f\_Burkholderiales-noname* on DR were commonly mediated by  
248 HbA1c (Supplementary Table S9).

249

## 250 Discussion

251 In this study, to explore causal gut microbes for DR, we applied two-sample MR analyses to examine  
252 causal associations between gut microbes, risk factors, and DR. Our results highlighted that eight  
253 bacterial taxon and 13 metabolic factors were casually associated with DR. Further, mediation analysis  
254 supported that the causal effects of gut microbes on DR were partially mediated by metabolic factors  
255 that related to DR.

256 Accumulating evidence supports the connection between gut microbiome and retina diseases, which  
257 is also called “gut-retina axis” [12, 31]. Dysbiosis in gut microbiota was convinced to contribute to the  
258 development of diabetes mellitus (DM) and its microvascular complications, including DR. For T1DM,  
259 gut microbes were involved in the autoimmune mechanisms, such as regulating immune cell functions  
260 and production of anti-inflammatory cytokines [32]. In T2DM, the dysbiosis of gut microbiome  
261 promotes intestinal permeability, LPS translocation, hyperactivation of inflammatory responses, and  
262 dysregulation of insulin-related pathways, exacerbating the progression of insulin resistance [33].

263 Regarding DR, gut microbes could influence the homeostasis of retinal tissue through multiple  
264 metabolites. Oresic et al. [34] have reported that gut microbiota affects lens and retinal lipid  
265 composition by comparing lipidomic profiling of lens and retina of germ-free and conventionally  
266 raised mice. Trimethylamine N-oxide (TMAO) derived from gut microbes could be an important  
267 regulator of DR-related dyslipidemia [35]. Floyd and Grant [12] have summarized supporting evidence  
268 for gut-eye axis derived from murine models, highlighting the role of secondary bile acid produced by  
269 gut microbes, namely tauroursodeoxycholate (TUDCA), in preventing exacerbation of DR. In addition,  
270 peptidoglycan (PGN) synthesized by gut microbiota could translocate into the circulation and travel to  
271 the retina and exacerbate DR by modulating retinal endothelial cells [13]. Although previous studies  
272 have demonstrated the association of gut microbes with DR, evidence for causal relationship between  
273 them is still limited.

274 In this MR study, we found that genus *Collinsella* and species *Collinsella aerofaciens* were detrimental,  
275 while species *Streptococcus salivarius*, *Ruminococcus torques*, *Bacteroides faecis*, and  
276 *Burkholderiales bacterium\_1\_1\_47* were protective for DR. Consistent with our results, previous  
277 studies have also revealed a positive correlation of *Collinsella* with type 2 diabetes [36, 37]. *Collinsella*  
278 belongs to the family *Coriobacteriaceae*, which is usually considered as pathogens. They could affect  
279 host metabolism by stimulating gut leakage, modulating lipid metabolism and increasing cumulative  
280 inflammatory burden [38]. A recent study [39] has also confirmed that *Collinsella* abundance is  
281 positively correlated with circulating insulin in overweight and obese pregnant women with low  
282 dietary fiber intake, which may contribute to insulin resistance during pregnancy. In line with  
283 accumulating studies suggesting an involvement of *Collinsella* in the development of diabetes, our  
284 results first provided supportive evidence that there is a causal contribution of *Collinsella* to promote  
285 the development of DR.

286 Moreover, a growing number of studies have also reported that various other gut microbial taxa may  
287 contribute to DR risk. For example, a case-control study [40] has revealed that patients with DR and  
288 DM are characterized in enrichment of *Bifidobacterium* and *Lactobacillus* and depletion of  
289 *Escherichia-Shigella*, *Faecalibacterium*, *Eubacterium\_hallii\_group*, and *Clostridium*, compared to  
290 healthy individuals. Pasteurellaceae was found to be a biomarker with strong precision that  
291 distinguishes the DR patients from the DM group. Shang et al. [36] found that DR patients had higher  
292 abundance of *Oscillospira*, but lower abundance of *Megamonas* in a Chinese population. Given that



293 dysbiosis of gut microbiome has been widely observed in patients with DR, reconstruction gut  
294 microbiome was thought to be able to prevent the development of DR. Recently, Beli et al. [14]  
295 reconstructed gut microbiome of mice by intermittent fasting and found that the altered gut  
296 microbiome (enrichment in *Firmicutes* and reduction in *Bacteroidetes*) produced more beneficial  
297 secondary BAs (e.g., TUDCA), which facilitate to decrease DR risk . The reduction of *Bifidobacterium*,  
298 *Clostridium*, and *Bacteroides* in *db/db*-IF mice was proposed to be responsible for the abnormal  
299 changes in levels of conjugated to unconjugated secondary BAs.

300 Several metabolic risk factors, including hyperglycemia, hypertension, and dyslipidemia, were known  
301 to confer higher risk for the progression of DR [10]. According to the Diabetes Control and  
302 Complications Trial (DCCT) [41], diabetes control with the goal of achieving blood glucose levels as  
303 close to the nondiabetic range as safely possible remarkably reduced the risk of the initiation and  
304 progression of DR, highlighting the importance of hyperglycemia in the etiology of DR.  
305 Hyperglycemia generally cause oxidative stress and glucose-mediated endothelium dysfunction and  
306 further influence retinal metabolic abnormalities [42]. For hypertension, epidemiological evidence has  
307 established that hypertension is a risk factor for retinopathy [43]. After 7 years' follow up, there was a  
308 47% reduction in risk of a decrease in vision with the 10 mm Hg reduction in SBP and 5 mm Hg  
309 reduction in DBP [44, 45]. In line with the concept that raised blood pressure (SBP, DBP) and blood  
310 glucose (2hGlu, FG, HbA1c) increased the risk of DR [10], our two-sample MR results provide robust  
311 genetic evidence to support that metabolic factors, such as hypertension, SBP, DBP, 2hGlu, FG, HbA1c,  
312 TG, and BMI, convey causal risk to DR.

313 In addition, our results also showed that BMI was causally associated with increased risk of DR based  
314 on European population. Consistently, previous studies based on cohorts of Caucasians [46] and  
315 Australians [47] have documented that there is a significant positive association between BMI and DR.  
316 However, other studies have reported a contradictory result that BMI is identified to be inversely  
317 associated with DR in cohorts of Singapore [48] and China [49]. This inconsistent finding indicates  
318 that the causal relationship between BMI and DR may be distinct in different ethnicities.

319 The associations of DR with serum lipids remained to be controversial. While HDL-C has been widely  
320 considered as a protective factor for DR [50-52], the NO BLIND study of Italy has reported that HDL-  
321 C is associated with a high risk of DR [53]. A similar contradictory association was also observed  
322 between total cholesterol and DR [54]. For TG and LDL-C, several studies have suggested that they  
323 are risk factors for DR, while others reported opposite results [54-56]. The Singapore Malay Eye Study  
324 reported higher total cholesterol levels as a protective factor for DR. In the current investigation, our  
325 large-scale two-sample MR results supports the protective effects of HDL-C and LDL-C on DR, and  
326 the detrimental role of TG on DR. IL-16 is a pro-inflammatory pleiotropic cytokine that functions as  
327 chemoattractant and modulator of T cell activation. It has been proposed that IL-16 in vitreous  
328 contributes to leukostasis and microvascular damage in the progression of proliferative diabetic  
329 retinopathy (PDR) [8] and rhegmatogenous retinal detachments (RRD) [57]. To date, no study on the

330 association between serum IL-16 and DR has been reported. In the present study, we found a significant  
331 protective effect of serum IL-16 on DR by leveraging two-sample MR analyses, which is in contrast  
332 with previous findings in vitreous. This may be due to totally different mechanisms of serum and  
333 vitreous IL-16 on DR. The prototypical acute-phase protein CRP is a risk inflammatory biomarker for  
334 diabetes [58], and has been reported to be positively correlated with severity of DR [59]. However,  
335 inverse association of CRP with DR had also been documented [6]. According to two-sample MR  
336 analysis in the current study, we did not observe significant causal association of DR with CRP. In  
337 addition, although serum inflammatory cytokines TNF- $\alpha$  and IL-6 have been proposed to be  
338 biomarkers for DR by previous studies [9, 60], we did not find any significant evidence for causal  
339 association of DR with them in our present investigation.

340 Finally, in the mediation analysis, *Streptococcus salivarius* was discovered to be causal gut microbe  
341 for DR through mediating FG. *S. salivarius*, which is a member of *viridans streptococci*. It is one of  
342 the primary inhabitants of human intestine and oral, and usually plays beneficial role but occasionally  
343 causes opportunistic infection. In the oral cavity, colocalized *S. salivarius* inhibits the emergence of  
344 pathogens by producing bacteriocins, such as lantibiotics. Thus, *S. salivarius* K12 is now used as an  
345 oral probiotic worldwide to sustain the hemostasis of oral microbiome [61]. The immunomodulatory  
346 and anti-inflammatory effect of *S. salivarius* was reported in intestinal epithelial cells [62] and mouse  
347 models [63]. Although the association of *S. salivarius* with DR has not been reported yet, the anti-  
348 diabetic effect of *S. salivarius* has been documented [64]. Chen et al. [64] found that  $\gamma$ -Aminobutyric  
349 acid (GABA) produced by *S. salivarius* subspecies *thermophiles* fmb5 in yogurt fermentation was  
350 capable of improving hyperglycaemia and decreasing the concentrations of serum total cholesterol and  
351 triacylglycerol. This supports our conclusion that intestinal *S. salivarius* negatively regulate blood  
352 glucose to decrease the risk of DR. In addition, in view of multiple lines of evidence [65-73] have  
353 reported that combining multi-omic data, including GWAS, single-cell RNA sequencing, and  
354 epigenetic data, contribute to reveal the molecular mechanism of complex diseases. More integrative  
355 genomic analyses of microbiome with other omics are needed to disentangle the casual etiology of DR.

356 In conclusion, our study proposed a causal association between *S. salivarius* and DR. Genetically  
357 elevated level of *S. salivarius* is causal associated with decreased risk of developing DR. Moreover,  
358 the causal effect of *S. salivarius* partially mediated by reducing level of fasting glucose. *S. salivarius*  
359 seems to be a possible probiotic supplement that could be used in the treatment or prevention of DR.  
360 Therefore, our findings support the hypothesis that gut microbes could be causal factors for DR and  
361 highlight the need for extensive research on how gut microbes affect the etiology of DR.

362

363 **Declarations**

364

365 **Fundings**

366 This study was funded by the National Natural Science Foundation of China (32200535 to Y.M;  
367 61871294 and 82172882 to J.S), the Scientific Research Foundation for Talents of Wenzhou Medical  
368 University (KYQD20201001 to Y.M.), the Science Foundation of Zhejiang Province (LR19C060001  
369 to J.S), and China Postdoctoral Science Foundation (2023M732679 to J.L).

#### 370 **Authors' contributions**

371 Y.M., J.L., and J.S. conceived and designed the study. J.L., G.Z., C.D., Y.Z., and Y.M. contributed to  
372 management of data collection. J.L., Y.M., and G.Z., conducted bioinformatics analysis and data  
373 interpretation. Y.M., J.S., and J.L. wrote the manuscripts. All authors reviewed and approved the final  
374 manuscript.

#### 375 **Data and materials availability:**

376 All the GWAS summary statistics used in this study can be accessed in the official websites  
377 (<https://gwas.mrcieu.ac.uk/>). The GTEx eQTL data (version 8) were downloaded from Zenodo  
378 repository (<https://zenodo.org/record/3518299#.Xv6Z6igzbg1>). The code to reproduce the results is  
379 available in a dedicated GitHub repository ([https://github.com/SulabMR/207GM\\_DR\\_MR](https://github.com/SulabMR/207GM_DR_MR)).

380

#### 381 **Ethics approval and consent to participate**

382 Not applicable

383

#### 384 **Consent for publication**

385 Not applicable

386

#### 387 **Competing interests:**

388 The authors declare no competing interests.

389

#### 390 **Figure legends:**

391

392 **Figure 1. Overview of this MR study.** Four O-link panels were applied to measure associations  
393 among gut microbes, DR risk factors and DR. At the primary MR step, genetic variants associated with  
394 gut microbes were identified based on results from their corresponding GWAS. Genetic variants that  
395 passed significant threshold were then used as instrumental variants to test their relationship with DR.  
396 In the second step, genetic variants associated with DR risk factors was extracted from corresponding  
397 GWAS to test MR causal relationship between DR risk factor and DR. Then, MR was applied to

398 measure causal relationship between gut microbes that passed significant threshold in the primary MR  
399 and DR risk factors screened from the second step. Finally, mediation analyses by two-sample MR  
400 were performed for the gut microbes that were causally associated with DR risk factors and DR.

401 **Figure 2. Effects of eight potential causal gut microbes on DR.** MR analyses of the effect of gut  
402 microbes on DR. The dots are the causal estimates on the OR scale, and the whiskers represent 95%  
403 confidence intervals for the ORs. P values were determined from the inverse-variance-weighted two-  
404 sample MR method.

405 **Figure 3. Causal effects of risk factors on DR.** MR analyses of the effect of risk factors on DR. The  
406 dots are the causal estimates on the OR scale, and the whiskers represent 95% confidence intervals for  
407 the ORs. P values were determined from the inverse-variance-weighted two-sample MR method. FI:  
408 fasting insulin, FG: fasting glucose, 2hGlu: 2h glucose after an oral glucose challenge, TG: triglyceride,  
409 HDL: high-density lipoprotein, LDL: low-density lipoprotein, SBP: systolic blood pressure, DBP:  
410 diastolic blood pressure, BMI: body mass index.

411 **Figure 4. Effect sizes (Z-score) of eight potential causal gut microbes on causal risk factors for**  
412 **DR.** MR analyses of the effect of gut microbes on DR risk factors. Colours in the heatmap represent  
413 the effect size (Z-score), with genetically predicted increased bacteria level associated with a higher  
414 risk of outcomes colored in red and lower risk of outcomes colored in blue. The darker the color the  
415 larger the effect size. \* Indicates that the causal association passed the threshold of raw p value < 0.05.  
416 \*\* raw p value < 0.01. \*\*\* raw p value < 0.001. Orange box indicates that the causal association passed  
417 the threshold of FDR < 0.05.

418 **Figure 5. Mediation effects of gut microbes on DR via risk factors.** Mediation analyses to quantify  
419 the effects of gut microbes on DR outcomes via risk factors. **a** Four “gut microbe – risk factor – DR”  
420 triplets that passed significant threshold (p value < 0.05) by mediation analyses. Solid lines indicate  
421 that mediation effect passed significant threshold of FDR < 0.05. Dotted lines indicate that mediation  
422 effect passed significant threshold of raw p value < 0.05. **b** Species *Ruminococcus torques* effect on  
423 DR mediated by fasting glucose.  $\beta_{EM}$  effects of exposure on mediator,  $\beta_{MO}$  effects of mediator on  
424 outcome,  $\beta_{EO}$  effects of exposure on outcome.

425

#### 426 **Supplementary Figure legends:**

427 **Supplementary Figure 1. Effect sizes (Z-score) of all gut microbes on DR.** MR analyses of the  
428 effect of all 207 gut microbes on DR. Colors in the heatmap represent the effect size (Z-score), with  
429 genetically predicted increased bacteria level associated with a higher risk of outcomes colored in red  
430 and lower risk of outcomes colored in blue. The darker the color the larger the effect size. \* Indicates  
431 that the causal association passed the threshold of raw p value < 0.05. \*\* raw p value < 0.01. \*\*\* raw  
432 p value < 0.001.

433 **Supplementary Figure 2. Effect sizes (Z-score) of all risk factors on DR.** MR analyses of the effect  
434 of all 22 risk factors on DR. Colors in the heatmap represent the effect size (Z-score), with genetically  
435 predicted increased risk factor level associated with a higher risk of outcomes colored in red and lower  
436 risk of outcomes colored in blue. The darker the color the larger the effect size. \* Indicates that the  
437 causal association passed the threshold of raw p value < 0.05. \*\* raw p value < 0.01. \*\*\* raw p value  
438 < 0.001.

439

## 440 References

- 441 1. Yau, J.W.Y., et al., *Global Prevalence and Major Risk Factors of Diabetic Retinopathy*. Diabetes Care, 2012.  
442 **35**(3): p. 556-564.
- 443 2. Study, V.L.E.G.o.t.G.B.o.D., *Causes of blindness and vision impairment in 2020 and trends over 30 years,*  
444 *and prevalence of avoidable blindness in relation to VISION 2020: the Right to Sight: an analysis for the*  
445 *Global Burden of Disease Study*. The Lancet Global Health, 2021. **9**(2): p. e144-e160.
- 446 3. Teo, Z.L., et al., *Global Prevalence of Diabetic Retinopathy and Projection of Burden through 2045:*  
447 *Systematic Review and Meta-analysis*. Ophthalmology, 2021. **128**(11): p. 1580-1591.
- 448 4. Wong, T.Y., et al., *Prevalence and Risk Factors for Diabetic Retinopathy: The Singapore Malay Eye Study*.  
449 Ophthalmology, 2008. **115**(11): p. 1869-1875.
- 450 5. Zhang, B., et al., *Integrated systems approach identifies genetic nodes and networks in late-onset*  
451 *Alzheimer's disease*. Cell, 2013. **153**(3): p. 707-20.
- 452 6. Lim, L.S., et al., *C-reactive protein, body mass index, and diabetic retinopathy*. Investigative ophthalmology  
453 & visual science, 2010. **51**(9): p. 4458-4463.
- 454 7. Funatsu, H., et al., *Relationship between vascular endothelial growth factor and interleukin-6 in diabetic*  
455 *retinopathy*. Retina, 2001. **21**(5): p. 469-477.
- 456 8. Loporchio, D.F., et al., *Cytokine levels in human vitreous in proliferative diabetic retinopathy*. Cells, 2021.  
457 **10**(5): p. 1069.
- 458 9. Myśliwiec, M., et al., *The role of vascular endothelial growth factor, tumor necrosis factor alpha and*  
459 *interleukin-6 in pathogenesis of diabetic retinopathy*. Diabetes Res Clin Pract, 2008. **79**(1): p. 141-6.
- 460 10. Jiao, J., et al., *Recent Insights into the Role of Gut Microbiota in Diabetic Retinopathy*. J Inflamm Res, 2021.  
461 **14**: p. 6929-6938.
- 462 11. Antonetti, D.A., P.S. Silva, and A.W. Stitt, *Current understanding of the molecular and cellular pathology of*  
463 *diabetic retinopathy*. Nature Reviews Endocrinology, 2021. **17**(4): p. 195-206.
- 464 12. Floyd, J.L. and M.B. Grant, *The Gut-Eye Axis: Lessons Learned from Murine Models*. Ophthalmology and  
465 Therapy, 2020. **9**(3): p. 499-513.
- 466 13. Duan, Y., et al., *Bone Marrow-Derived Cells Restore Functional Integrity of the Gut Epithelial and Vascular*  
467 *Barriers in a Model of Diabetes and ACE2 Deficiency*. Circ Res, 2019. **125**(11): p. 969-988.
- 468 14. Beli, E., et al., *Restructuring of the Gut Microbiome by Intermittent Fasting Prevents Retinopathy and*  
469 *Prolongs Survival in db/db Mice*. Diabetes, 2018. **67**(9): p. 1867-1879.
- 470 15. Lopera-Maya, E.A., et al., *Effect of host genetics on the gut microbiome in 7,738 participants of the Dutch*  
471 *Microbiome Project*. Nat Genet, 2022. **54**(2): p. 143-151.
- 472 16. Carter, A.R., et al., *Mendelian randomisation for mediation analysis: current methods and challenges for*  
473 *implementation*. Eur J Epidemiol, 2021. **36**(5): p. 465-478.

- 474 17. Kurki, M.I., et al., *FinnGen provides genetic insights from a well-phenotyped isolated population*. Nature, 2023. **613**(7944): p. 508-518.
- 475
- 476 18. Atchison, E. and A. Barkmeier, *The role of systemic risk factors in diabetic retinopathy*. Current ophthalmology reports, 2016. **4**: p. 84-89.
- 477
- 478 19. van Leiden, H.A., et al., *Blood Pressure, Lipids, and Obesity Are Associated With Retinopathy: The Hoorn Study*. Diabetes Care, 2002. **25**(8): p. 1320-1325.
- 479
- 480 20. Meleth, A.D., et al., *Serum inflammatory markers in diabetic retinopathy*. Investigative ophthalmology & visual science, 2005. **46**(11): p. 4295-4301.
- 481
- 482 21. Park, K.S., et al., *Serum and tear levels of nerve growth factor in diabetic retinopathy patients*. American Journal of Ophthalmology, 2008. **145**(3): p. 432-437.
- 483
- 484 22. Davey Smith, G. and G. Hemani, *Mendelian randomization: genetic anchors for causal inference in epidemiological studies*. Human molecular genetics, 2014. **23**(R1): p. R89-R98.
- 485
- 486 23. Smith, G.D., *Mendelian randomization for strengthening causal inference in observational studies: application to gene x environment interactions*. Perspectives on Psychological Science, 2010. **5**(5): p. 527-545.
- 487
- 488
- 489 24. Chen, L., et al., *Systematic Mendelian randomization using the human plasma proteome to discover potential therapeutic targets for stroke*. Nat Commun, 2022. **13**(1): p. 6143.
- 490
- 491 25. Burgess, S., A. Butterworth, and S.G. Thompson, *Mendelian randomization analysis with multiple genetic variants using summarized data*. Genetic epidemiology, 2013. **37**(7): p. 658-665.
- 492
- 493 26. Bowden, J., G. Davey Smith, and S. Burgess, *Mendelian randomization with invalid instruments: effect estimation and bias detection through Egger regression*. International journal of epidemiology, 2015. **44**(2): p. 512-525.
- 494
- 495
- 496 27. Verbanck, M., et al., *Detection of widespread horizontal pleiotropy in causal relationships inferred from Mendelian randomization between complex traits and diseases*. Nature genetics, 2018. **50**(5): p. 693-698.
- 497
- 498 28. Chen, L., et al., *Systematic Mendelian randomization using the human plasma proteome to discover potential therapeutic targets for stroke*. Nature communications, 2022. **13**(1): p. 6143.
- 499
- 500 29. Carter, A.R., et al., *Understanding the consequences of education inequality on cardiovascular disease: mendelian randomisation study*. BMJ (Clinical research ed.), 2019. **365**: p. l1855-l1855.
- 501
- 502 30. Burgess, S. and S.G. Thompson, *Interpreting findings from Mendelian randomization using the MR-Egger method*. European Journal of Epidemiology, 2017. **32**(5): p. 377-389.
- 503
- 504 31. Scuderi, G., E. Troiani, and A.M. Minnella, *Gut microbiome in retina health: the crucial role of the gut-retina axis*. Frontiers in Microbiology, 2022. **12**: p. 4246.
- 505
- 506 32. Vasu, S., et al., *Mechanisms of toxicity by proinflammatory cytokines in a novel human pancreatic beta cell line, 1.1B4*. Biochimica et Biophysica Acta (BBA) - General Subjects, 2014. **1840**(1): p. 136-145.
- 507
- 508 33. Sircana, A., et al., *Altered Gut Microbiota in Type 2 Diabetes: Just a Coincidence?* Current Diabetes Reports, 2018. **18**(10): p. 98.
- 509
- 510 34. Orešič, M., et al., *Gut microbiota affects lens and retinal lipid composition*. Experimental Eye Research, 2009. **89**(5): p. 604-607.
- 511
- 512 35. Heianza, Y., et al., *Gut microbiota metabolites, amino acid metabolites and improvements in insulin sensitivity and glucose metabolism: the POUNDS Lost trial*. Gut, 2019. **68**(2): p. 263-270.
- 513
- 514 36. Shang, J., et al., *Liraglutide-induced structural modulation of the gut microbiota in patients with type 2 diabetes mellitus*. PeerJ, 2021. **9**: p. e11128.
- 515
- 516 37. Lambeth, S.M., et al., *Composition, Diversity and Abundance of Gut Microbiome in Prediabetes and Type 2 Diabetes*. J Diabetes Obes, 2015. **2**(3): p. 1-7.
- 517

- 518 38. Ruiz-Limón, P., et al., *Collinsella is associated with cumulative inflammatory burden in an established*  
519 *rheumatoid arthritis cohort*. Biomedicine & Pharmacotherapy, 2022. **153**: p. 113518.
- 520 39. Gomez-Arango, L.F., et al., *Low dietary fiber intake increases Collinsella abundance in the gut microbiota*  
521 *of overweight and obese pregnant women*. Gut microbes, 2018. **9**(3): p. 189-201.
- 522 40. Huang, Y., et al., *Dysbiosis and implication of the gut microbiota in diabetic retinopathy*. Frontiers in Cellular  
523 and Infection Microbiology, 2021. **11**: p. 646348.
- 524 41. Aiello, L.P., *Diabetic retinopathy and other ocular findings in the diabetes control and complications*  
525 *trial/epidemiology of diabetes interventions and complications study*. Diabetes Care, 2014. **37**(1): p. 17-23.
- 526 42. Kowluru, R.A., et al., *TIAM1-RAC1 signalling axis-mediated activation of NADPH oxidase-2 initiates*  
527 *mitochondrial damage in the development of diabetic retinopathy*. Diabetologia, 2014. **57**(5): p. 1047-56.
- 528 43. Klein, R. and B.E. Klein, *Blood pressure control and diabetic retinopathy*. Br J Ophthalmol, 2002. **86**(4): p.  
529 365-7.
- 530 44. Nathan, D.M., et al., *The effect of intensive treatment of diabetes on the development and progression of*  
531 *long-term complications in insulin-dependent diabetes mellitus*. N Engl J Med, 1993. **329**(14): p. 977-86.
- 532 45. *Intensive blood-glucose control with sulphonylureas or insulin compared with conventional treatment and*  
533 *risk of complications in patients with type 2 diabetes (UKPDS 33). UK Prospective Diabetes Study (UKPDS)*  
534 *Group*. Lancet, 1998. **352**(9131): p. 837-53.
- 535 46. van Leiden, H.A., et al., *Blood pressure, lipids, and obesity are associated with retinopathy: the hoorn study*.  
536 Diabetes Care, 2002. **25**(8): p. 1320-5.
- 537 47. Dirani, M., et al., *Are obesity and anthropometry risk factors for diabetic retinopathy? The diabetes*  
538 *management project*. Invest Ophthalmol Vis Sci, 2011. **52**(7): p. 4416-21.
- 539 48. Rooney, D., et al., *Body mass index and retinopathy in Asian populations with diabetes mellitus*. Acta  
540 Diabetol, 2015. **52**(1): p. 73-80.
- 541 49. Lu, J., et al., *Association between body mass index and diabetic retinopathy in Chinese patients with type*  
542 *2 diabetes*. Acta Diabetol, 2015. **52**(4): p. 701-8.
- 543 50. Chen, X., et al., *Circulating level of homocysteine contributes to diabetic retinopathy associated with*  
544 *dysregulated lipid profile and impaired kidney function in patients with type 2 diabetes mellitus*. Eye, 2022.
- 545 51. Li, N., et al., *Associations of genetically determined lipid traits and lipid-modifying agents with the risk of*  
546 *diabetic retinopathy: A Mendelian randomization study*. Atherosclerosis, 2023. **369**: p. 9-16.
- 547 52. Ezhilvendhan, K., et al., *Association of Dyslipidemia with Diabetic Retinopathy in Type 2 Diabetes Mellitus*  
548 *Patients: A Hospital-Based Study*. Journal of Pharmacy and Bioallied Sciences, 2021. **13**(Suppl 2).
- 549 53. Sasso, F.C., et al., *High HDL cholesterol: A risk factor for diabetic retinopathy? Findings from NO BLIND*  
550 *study*. Diabetes Research and Clinical Practice, 2019. **150**: p. 236-244.
- 551 54. Liu, Y., et al., *Protective factors for diabetic retinopathy in Type 2 diabetes mellitus patients: Long duration*  
552 *of no less than 10 years*. Journal of Diabetes and its Complications, 2019. **33**(10): p. 107383.
- 553 55. Klein, R., et al., *The relation of atherosclerotic cardiovascular disease to retinopathy in people with diabetes*  
554 *in the Cardiovascular Health Study*. British journal of ophthalmology, 2002. **86**(1): p. 84-90.
- 555 56. Klein, B.E., R. Klein, and S.E. Moss, *Is serum cholesterol associated with progression of diabetic retinopathy*  
556 *or macular edema in persons with younger-onset diabetes of long duration?* American journal of  
557 ophthalmology, 1999. **128**(5): p. 652-654.
- 558 57. Balogh, A., et al., *Position of macula lutea and presence of proliferative vitreoretinopathy affect*  
559 *vitreous cytokine expression in rhegmatogenous retinal detachment*. PLoS One, 2020. **15**(6): p. e0234525.
- 560 58. Chase, H.P., et al., *Elevated C-reactive protein levels in the development of type 1 diabetes*. Diabetes, 2004.  
561 **53**(10): p. 2569-73.

- 562 59. Qiu, F., et al., *Pathogenic role of human C-reactive protein in diabetic retinopathy*. *Clinical Science*, 2020.  
563 **134**(13): p. 1613-1629.
- 564 60. Vujosevic, S. and R. Simó, *Local and Systemic Inflammatory Biomarkers of Diabetic Retinopathy: An*  
565 *Integrative Approach*. *Investigative Ophthalmology & Visual Science*, 2017. **58**(6): p. BIO68-BIO75.
- 566 61. Delorme, C., et al., *Genomics of Streptococcus salivarius, a major human commensal*. *Infection, Genetics*  
567 *and Evolution*, 2015. **33**: p. 381-392.
- 568 62. Kaci, G., et al., *Inhibition of the NF- $\kappa$ B pathway in human intestinal epithelial cells by commensal*  
569 *Streptococcus salivarius*. *Applied and environmental microbiology*, 2011. **77**(13): p. 4681-4684.
- 570 63. Kaci, G., et al., *Anti-inflammatory properties of Streptococcus salivarius, a commensal bacterium of the oral*  
571 *cavity and digestive tract*. *Applied and environmental microbiology*, 2014. **80**(3): p. 928-934.
- 572 64. Chen, L., et al.,  *$\gamma$ -Aminobutyric acid-rich yogurt fermented by Streptococcus salivarius subsp. thermophiles*  
573 *fmb5 appars to have anti-diabetic effect on streptozotocin-induced diabetic mice*. *Journal of Functional*  
574 *Foods*, 2016. **20**: p. 267-275.
- 575 65. Zhang Y, Ma Y, Huang Y, et al. Benchmarking algorithms for pathway activity transformation of single-cell  
576 RNA-seq data. *Computational and structural biotechnology journal*. 2020;18:2953-2961.
- 577 66. Ma Y, Li MD. Establishment of a strong link between smoking and cancer pathogenesis through DNA  
578 methylation analysis. *Scientific reports*. 2017;7(1):1-13.
- 579 67. Ma Y, Li J, Xu Y, et al. Identification of 34 genes conferring genetic and pharmacological risk for the  
580 comorbidity of schizophrenia and smoking behaviors. *Aging (Albany NY)*. 2020;12(3):2169.
- 581 68. Ma Y, Qiu F, Deng C, et al. Integrating single-cell sequencing data with GWAS summary statistics reveals  
582 CD16+ monocytes and memory CD8+ T cells involved in severe COVID-19. *Genome Medicine*.  
583 2022;14(1):16.
- 584 69. Ma Y, Zhou Y, Jiang D, et al. Integration of human organoids single-cell transcriptomic profiles and human  
585 genetics repurposes critical cell type-specific drug targets for severe COVID-19. *Cell Proliferation*.  
586 2023:e13558.
- 587 70. Liu Z, Zhang Y, Ma N, et al. Progenitor-like exhausted SPRY1+ CD8+ T cells potentiate responsiveness to  
588 neoadjuvant PD-1 blockade in esophageal squamous cell carcinoma. *Cancer Cell*. 2023;41(11):1852-1870.  
589 e1859.
- 590 71. Xiang B, Deng C, Qiu F, et al. Single Cell Sequencing Analysis Identifies Genetics-Modulated ORMDL3+  
591 Cholangiocytes Having Higher Metabolic Effects On Primary Biliary Cholangitis. *Journal of*  
592 *Nanobiotechnology*. 2021;19(1):406.
- 593 72. Chen L, Mou X, Li J, et al. Alterations in gut microbiota and host transcriptome of patients with coronary  
594 artery disease. *BMC microbiology*. 2023;23(1):320.
- 595 73. Ma Y, Deng C, Zhou Y, et al. Polygenic regression uncovers trait-relevant cellular contexts through pathway  
596 activation transformation of single-cell RNA sequencing data. *Cell Genom*. 2023;3(9):100383.
- 597



Figure 1

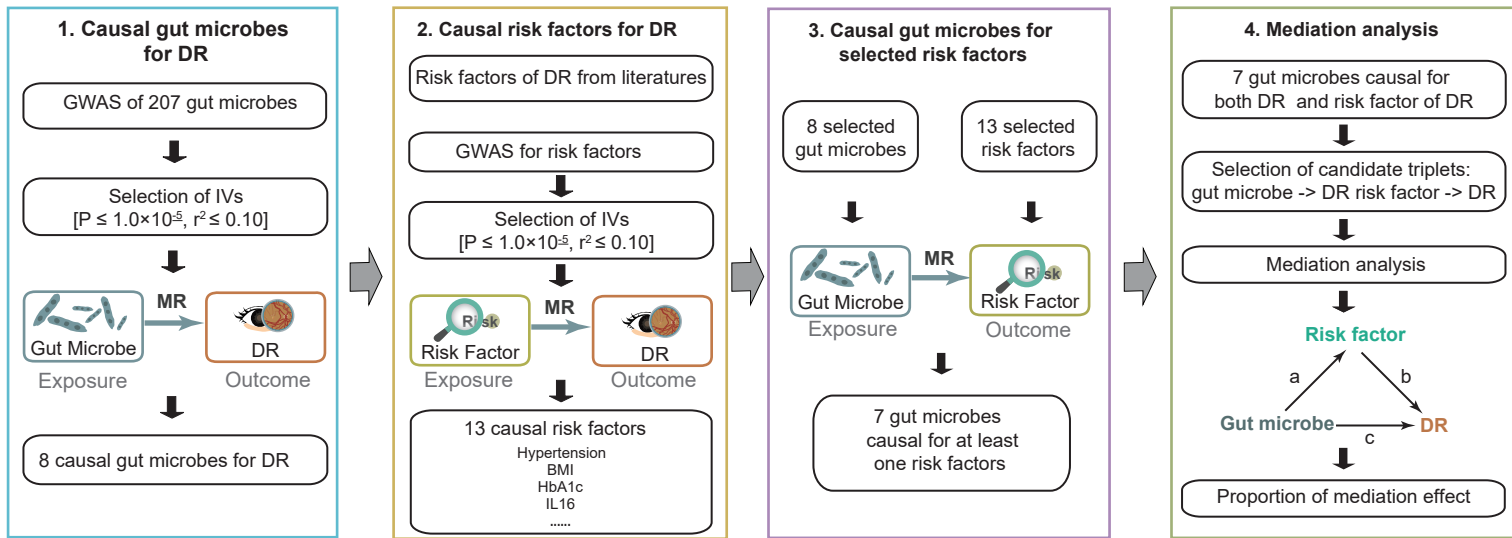

Figure 2

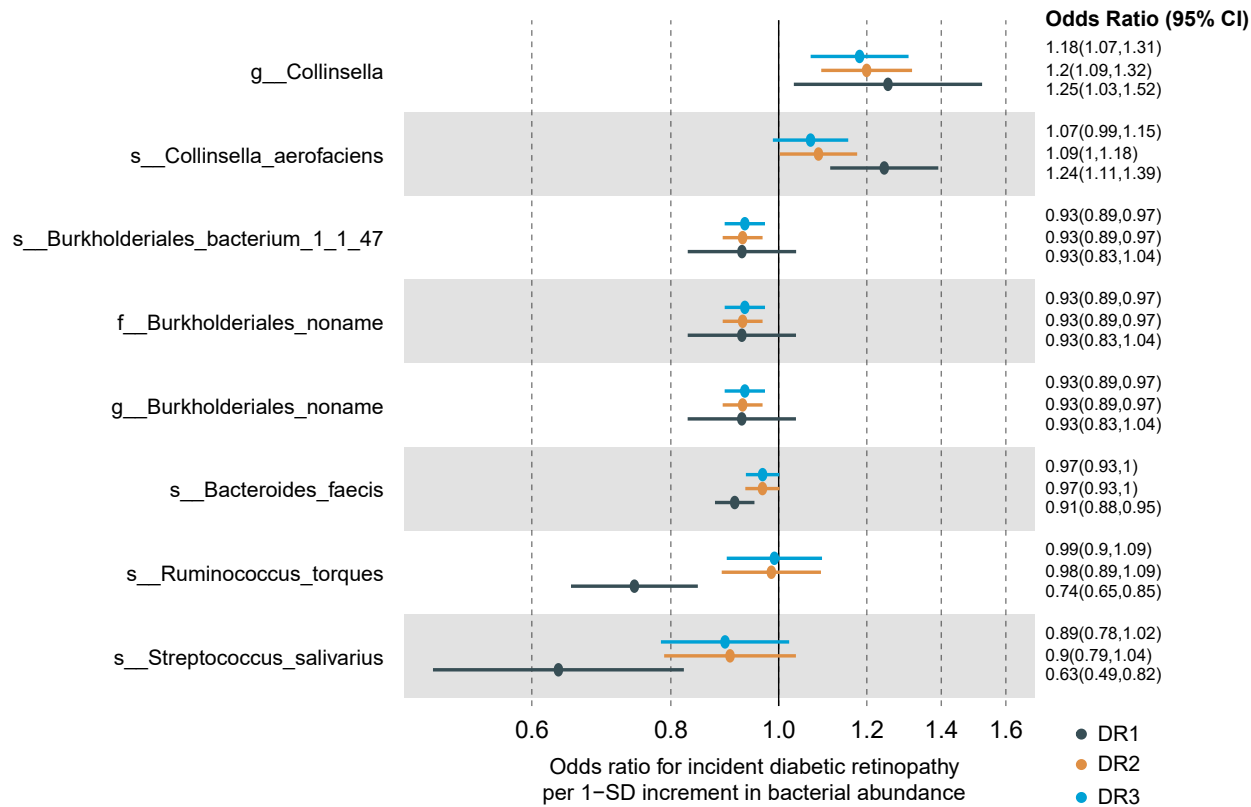

Figure 3

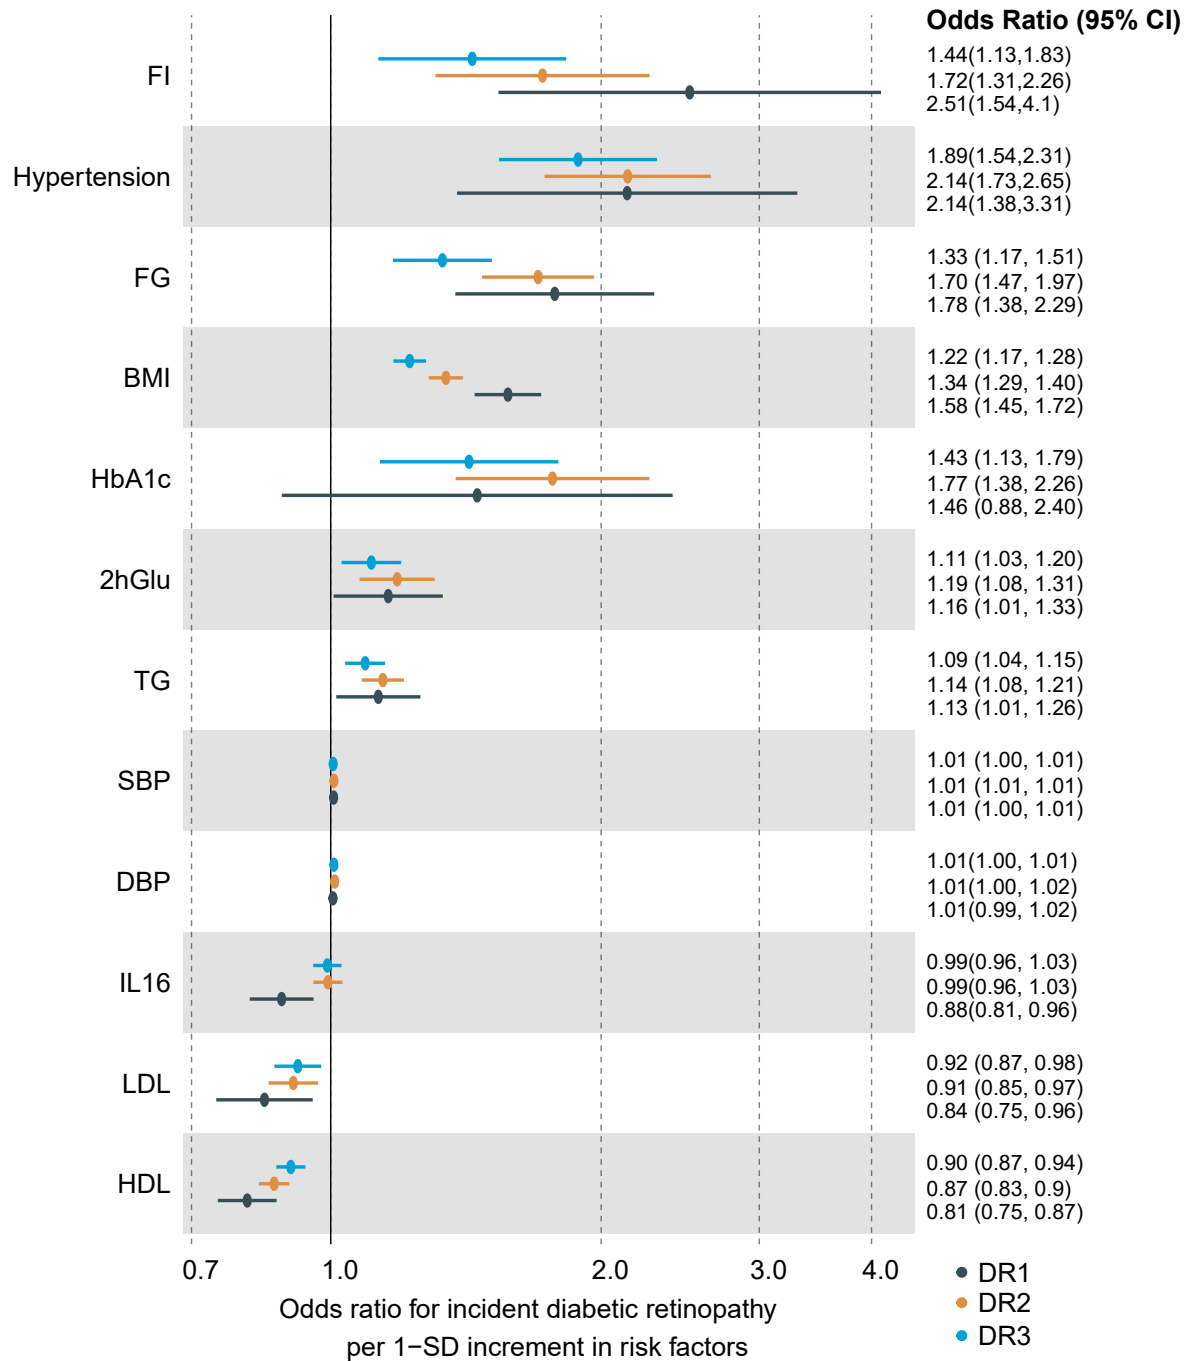

Figure 4

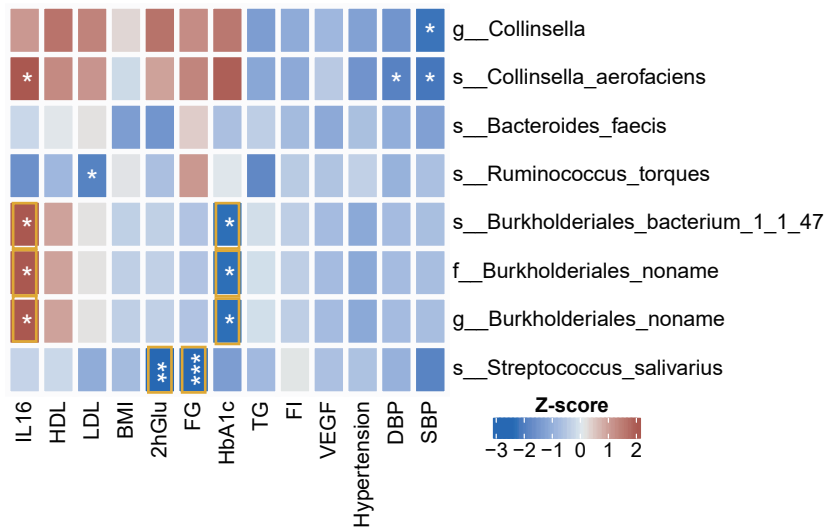

Figure 5

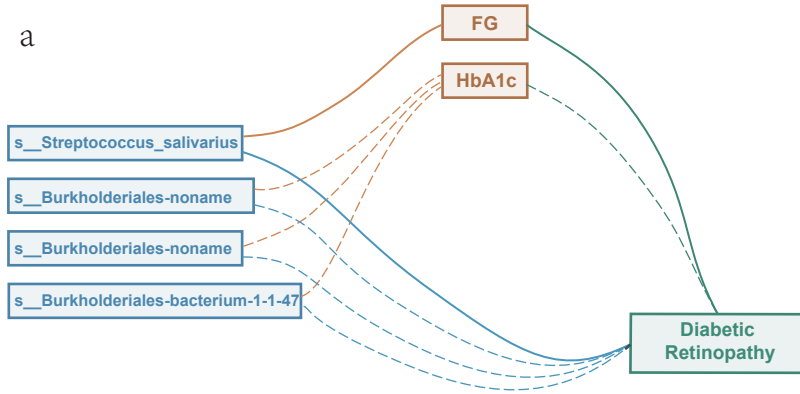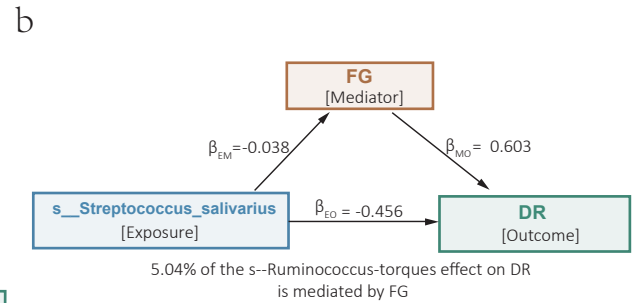

Source: https://medrxiv.org/content/medrxiv/early/2023/12/22/2023.12.19.23300249.full.pdf
