# Supplementary material for: Mendelian randomization analysis identifies a causal effect of Streptococcus salivarius on DR mediating via the level of host fasting glucose
Source: bioRxiv or medRxiv preprint supplement (doi:10.1101/2023.12.19.23300249), 2023-12-22

Supplementary Fig. 2

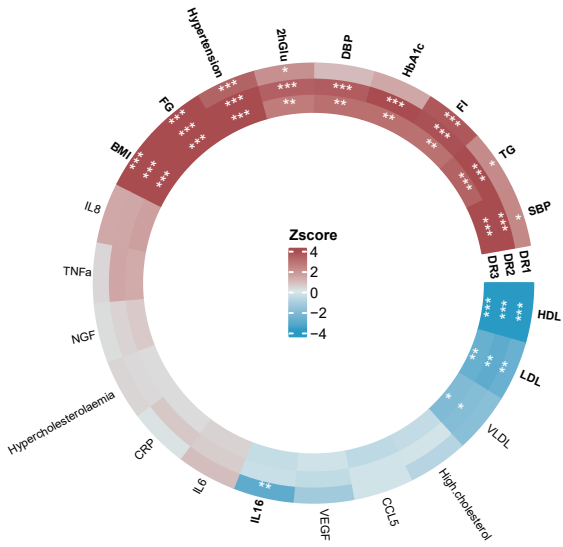

Supplement: Supplementary file [file media-2.pdf]
